# Supplementary material for: ZNF711 down-regulation promotes CISPLATIN resistance in epithelial ovarian cancer via interacting with JHDM2A and suppressing SLC31A1 expression
Source: PubMed Central journal article supplement — eBioMedicine. 2021 Sep 11;71:103558. doi: 10.1016/j.ebiom.2021.103558 (PMC8441092; doi:10.1016/j.ebiom.2021.103558), 2021-09-11
Supplement: mmc1.pdf [file mmc1.pdf]

## Supplementary Information

### Supplementary Tables

**Supplementary Table S1.** The relationship between ZNF711 and clinical pathological characteristics in 150 patients with EOC.

| Parameters                   | Number of cases | ZNF711 expression |             | P values |
|------------------------------|-----------------|-------------------|-------------|----------|
|                              |                 | Low (n=84)        | High (n=66) |          |
| <b>Age (years)</b>           |                 |                   |             |          |
| < 62                         | 80              | 44                | 36          | 0.869    |
| ≥ 62                         | 70              | 40                | 30          |          |
| <b>Histological type</b>     |                 |                   |             |          |
| Serous                       | 119             | 69                | 50          | 0.185    |
| Endometrioid                 | 17              | 8                 | 9           |          |
| Mucinous                     | 3               | 3                 | 0           |          |
| Undifferentiated             | 11              | 4                 | 7           |          |
| <b>FIGO stage</b>            |                 |                   |             |          |
| I or II                      | 53              | 16                | 37          | <0.001   |
| III or IV                    | 97              | 68                | 29          |          |
| <b>Histologic grade</b>      |                 |                   |             |          |
| 1                            | 17              | 16                | 1           | <0.001   |
| 2                            | 13              | 4                 | 9           |          |
| 3                            | 120             | 64                | 56          |          |
| <b>SLC31A1 expression</b>    |                 |                   |             |          |
| Low                          | 81              | 64                | 17          | <0.001   |
| High                         | 69              | 20                | 49          |          |
| <b>Chemo-response status</b> |                 |                   |             |          |
| Chemosensitivity             | 58              | 26                | 32          | 0.042    |
| Chemoresistance              | 92              | 58                | 34          |          |
| <b>Survival status</b>       |                 |                   |             |          |
| Dead                         | 107             | 73                | 34          | < 0.001  |
| Alive                        | 43              | 11                | 32          |          |

**Supplementary Table S2.** Univariate and multivariate analysis of factors associated with over-all survival in 150 EOC patients.

| Characteristics              | Univariate analysis     |                 | Multivariate analysis  |                 |
|------------------------------|-------------------------|-----------------|------------------------|-----------------|
|                              | HR (95% CI)             | <i>P</i> values | HR (95% CI)            | <i>P</i> values |
| <b>Age (years)</b>           | 1.067<br>(0.730-1.560)  | 0.736           |                        |                 |
| <b>Histological type</b>     | 0.956<br>(0.768-1.190)  | 0.688           |                        |                 |
| <b>FIGO stage</b>            | 1.575<br>(1.036 -2.393) | 0.033           |                        |                 |
| <b>Histologic grade</b>      | 0.840<br>(0.624-1.132)  | 0.253           |                        |                 |
| <b>SLC31A1 expression</b>    | 0.639<br>(0.434-0.942)  | 0.024           |                        |                 |
| <b>Chemo-response status</b> | 2.742<br>(1.814-4.145)  | < 0.001         | 2.428<br>(1.598-3.688) | < 0.001         |
| <b>ZNF711 expression</b>     | 0.422<br>(0.280-0.635)  | < 0.001         | 0.489<br>(0.323-0.740) | 0.001           |

HR, hazard ratio; CI, confidence interval.

**Supplementary Table S3. Primers and Oligonucleotides**

| <b>Used for sub-cloning and plasmid construction:</b>         |                                                                      |
|---------------------------------------------------------------|----------------------------------------------------------------------|
| <b>Primer used for FLAG tagged ZNF711</b>                     |                                                                      |
| ZNF711-up                                                     | GccAGATCTgccATGGATTCAGGCGGTGGAAGTCTTG                                |
| ZNF711-dn                                                     | gccGAATTCgccTTACATAAGAGCCTCTTTGTGGTGC                                |
| <b>Primer used for ZNF711 shRNA</b>                           |                                                                      |
| pSuper Retro<br>ZNF711-RNAi#1-up                              | GATCCCCAUUUUCUUUGGGAAAACGCUC<br>TTCAAGAGAUAAAAGAAACCCUUUUGCGAGTTTTTA |
| pSuper Retro<br>ZNF711-RNAi#1-dn                              | AGCTTAAAAACUCGCAAAAGGGUUUCUUUA<br>TCTCTTGAAGAGCGUUUCCCAAAGAAAUGGG    |
| pSuper Retro<br>ZNF711-RNAi#2-up                              | GATCCCCUAAAAUCUGCAGCAAUUUCUU<br>TTCAAGAGAAUUUAGACGUCGUUAAAGAATTTTTA  |
| pSuper Retro<br>ZNF711-RNAi#2-dn                              | AGCTTAAAAAUUCUUUAACGACGUCUAAAAU<br>TCTCTTGAAAAGAAAUUGCUGCAGAUUUUAGGG |
| <b>Primer used for SLC31A1 promoter reporter construction</b> |                                                                      |
| P1-luc-up                                                     | GCCATGGACTACAAGGACGACGATGACAAGCCTCAGTAT<br>GTCTTTTACCATCAA           |
| P1-luc-dn                                                     | AGTGCTAGCAAGCTTCATATCCTCCAGTCCCGAGCTCTTT<br>CTCCT                    |
| P2-luc-up                                                     | GCCATGGACTACAAGGACGACGATGACAAGCGGGGTAG<br>GAAGGGAACAGAGTGGT          |
| P2-luc-dn                                                     | AGTGCTAGCAAGCTTCATATCCTCCAGTCCCGAGCTCTTT<br>CTCCT                    |
| P3-luc-up                                                     | GCCATGGACTACAAGGACGACGATGACAAGGAACACCAT<br>AAGCAGTCCCTGTCCG          |
| P3-luc-dn                                                     | AGTGCTAGCAAGCTTCATATCCTCCAGTCCCGAGCTCTTT<br>CTCCT                    |
| P4-luc-up                                                     | GCCATGGACTACAAGGACGACGATGACAAGGCACCGGA<br>ATGTGGCAAGGGTCTCC          |
| P4-luc-dn                                                     | AGTGCTAGCAAGCTTCATATCCTCCAGTCCCGAGCTCTTT<br>CTCCT                    |
| P5-luc-up                                                     | GCCATGGACTACAAGGACGACGATGACAAGCCTCAGTAT<br>GTCTTTTACCATCAA           |
| P5-luc-dn                                                     | AGTGCTAGCAAGCTTCATATGAGGAAGGGTTTTGTCTCTT<br>TTAGT                    |
| P6-luc-up                                                     | GCCATGGACTACAAGGACGACGATGACAAGCAAGCTGTC<br>CACTGGCACAACACAA          |

|                                         |                                                   |
|-----------------------------------------|---------------------------------------------------|
| P6-luc-dn                               | AGTGCTAGCAAGCTTCATATTGGAGGGCGTGGCTGAGAG<br>ATACCG |
| <b>Primer used for qPCR</b>             |                                                   |
| ZNF711-up                               | ATGGCCCATACCATGATTATGC                            |
| ZNF711-dn                               | TCAGCTTCAAGTACCGCTTCA                             |
| SLC31A1-up                              | GGGGATGAGCTATATGGACTCC                            |
| SLC31A1-dn                              | TCACCAAACCGGAAAACAGTAG                            |
| JHDM2A-up                               | GTGCTCACGCTCGGAGAAA                               |
| JHDM2A -dn                              | GTGGGAAACAGCTCGAATGGT                             |
| <b>siRNA</b>                            |                                                   |
| SLC31A1 si #1                           | UUUUUCCAGGAAAAGUUGAG                              |
| SLC31A1 si #2                           | AUUCUAAAAGCCAAAGUAGAA                             |
| JHDM2A si #1                            | UUCUUUCCUCCAAGAUUCCC                              |
| JHDM2A si #2                            | UGUUCUACUAAAAAUGCUCUC                             |
| EHMT2 si #1                             | GGCAUCUCAGGAGGAUGCCAAUGAA                         |
| EHMT2 si #2                             | AAGAUUCUCAGAUUCAUCCCC                             |
| <b>MSP primers for SLC31A1 promoter</b> |                                                   |
| Set1/Methylated-up                      | TAAGAGAGATGTCGGGTTTCG                             |
| Set1/Methylated-dn                      | AAACCCTTACCACATTCCGATA                            |
| Set1/Unmethylated-up                    | TAAGAGAGATGTTGGGTTTTGAA                           |
| Set1/Unmethylated-dn                    | AAAACCCTTACCACATTCCAATA                           |
| Set2/Methylated-up                      | TTCGTTAAGAGAGATGTCGGG                             |
| Set2/Methylated-dn                      | AACCCTTACCACATTCCGATA                             |
| Set2/Unmethylated-up                    | TTTGTTAAGAGAGATGTTGGG                             |
| Set2/Unmethylated-dn                    | AAAACCCTTACCACATTCCAATA                           |
| Set3/Methylated-up                      | TTCGTTAAGAGAGATGTCGGG                             |
| Set3/Methylated-dn                      | AAACCCTTACCACATTCCGATA                            |
| Set3/Unmethylated-up                    | TTTGTTAAGAGAGATGTTGGG                             |
| Set3/Unmethylated-dn                    | AAAACCCTTACCACATTCCAATA                           |

| <b>Supplementary Table S4. Potential trans-regulatory factors were enriched on the SLC31A1 promoter in HEY/ZNF711 cells</b> |                                                |                          |                 |                  |                |
|-----------------------------------------------------------------------------------------------------------------------------|------------------------------------------------|--------------------------|-----------------|------------------|----------------|
| <b>Protein</b>                                                                                                              | <b>Gene name</b>                               | <b>Log2(Fold change)</b> | <b>-10lg(P)</b> | <b>#Peptides</b> | <b>#Unique</b> |
| ZNF711_HUMAN                                                                                                                | zinc finger protein 711                        | 2.573                    | 77.18           | 59               | 50             |
| JHDM2A_HUMAN                                                                                                                | JmjC-domain-containing histone demethylase 2A  | 1.789                    | 53.68           | 40               | 32             |
| CTNNB1_HUMAN                                                                                                                | Catenin beta-1                                 | 1.427                    | 42.81           | 32               | 28             |
| POLR2A_HUMAN                                                                                                                | RNA polymerase II subunit A                    | 1.423                    | 56.70           | 52               | 47             |
| TBP_HUMAN                                                                                                                   | TATA-box binding protein                       | 1.392                    | 61.76           | 30               | 27             |
| ANM1_HUMAN                                                                                                                  | Protein arginine N-methyltransferase 1         | 1.384                    | 47.74           | 8                | 6              |
| FLVCR1_HUMAN                                                                                                                | FLVCR heme transporter 1                       | 1.302                    | 26.47           | 9                | 6              |
| CHTOP_HUMAN                                                                                                                 | chromatin target of PRMT1                      | 1.255                    | 55.51           | 8                | 6              |
| KMT2B_HUMAN                                                                                                                 | lysine methyltransferase 2B                    | 1.149                    | 14.46           | 5                | 3              |
| CTNA1_HUMAN                                                                                                                 | catenin (cadherin-associated protein), alpha 1 | 1.134                    | 32.01           | 5                | 2              |
| SMAD5_HUMAN                                                                                                                 | SMAD family member 5                           | 1.131                    | 21.12           | 4                | 1              |
| IFRD2_HUMAN                                                                                                                 | interferon related developmental regulator 2   | 1.130                    | 23.89           | 4                | 1              |
| TIF1B_HUMAN                                                                                                                 | tripartite motif containing 28                 | 1.090                    | 32.70           | 3                | 1              |
| RPL36_HUMAN                                                                                                                 | 60S ribosomal protein L36                      | 1.077                    | 19.69           | 3                | 1              |
| KDM1A_HUMAN                                                                                                                 | lysine demethylase 1A                          | 1.071                    | 12.21           | 2                | 1              |

## Supplemental Figures and Figure Legends

### Supplemental Figure 1

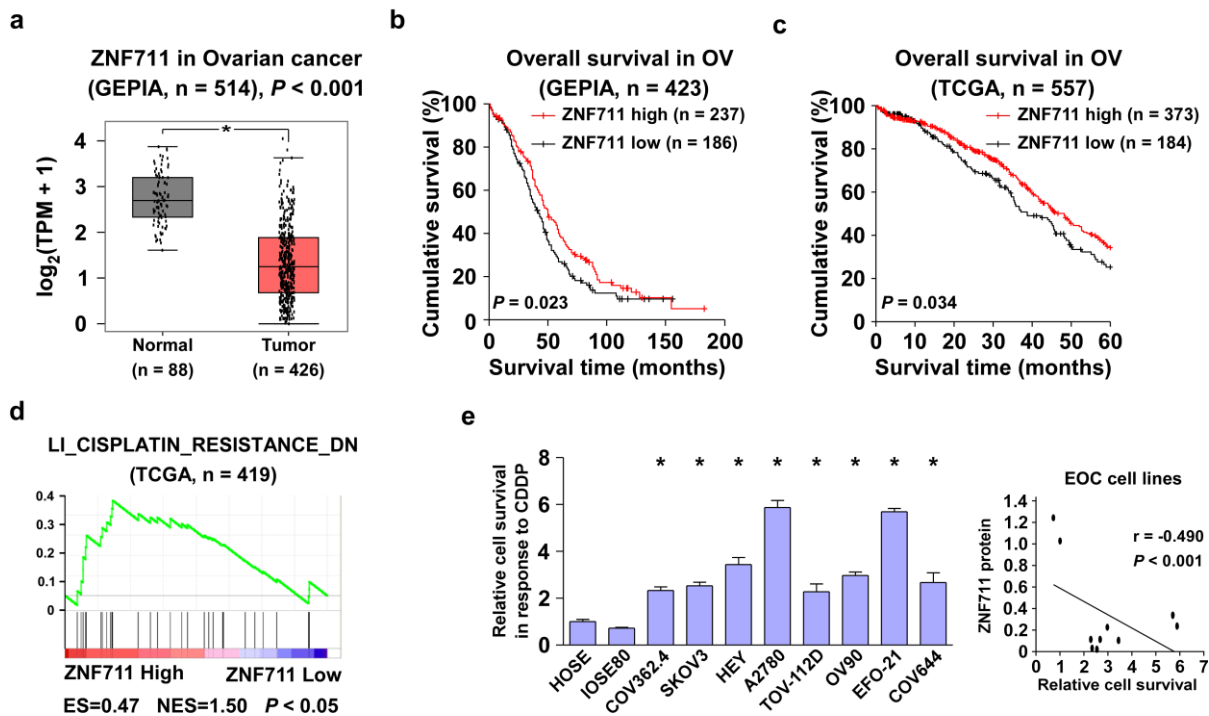

### Supplemental Fig. 1. ZNF711 was significantly downregulated in EOC cells and tissues.

(a) According to the gene expression profiling interactive analysis (GEPIA) dataset, ZNF711 expression was significantly suppressed in ovarian cancer tissues compared with the GTEx data.  $*P < 0.05$  (Unpaired t test). (b) Analysis of overall survival of ovarian cancer from GEPIA database. (c) Kaplan-Meier analysis of overall survival of ovarian cancer patients from the Cancer Genome Atlas (TCGA) dataset. (d) The gene set enrichment analysis (GSEA) revealed that ZNF711 was inversely correlated with CDDP resistance. (e) The relative cell survival of indicated cells following CDDP treatment ( $5\mu\text{M}$ ). Each bar shown in the figure represents the mean  $\pm$  SD of three independent experiments.  $*P < 0.05$  (one-way ANOVA with Bonferroni's correction). The cut-off used to define low and high tumors in Supplemental Fig.1b and c was auto selection of best cut-off.

Supplemental Figure 2

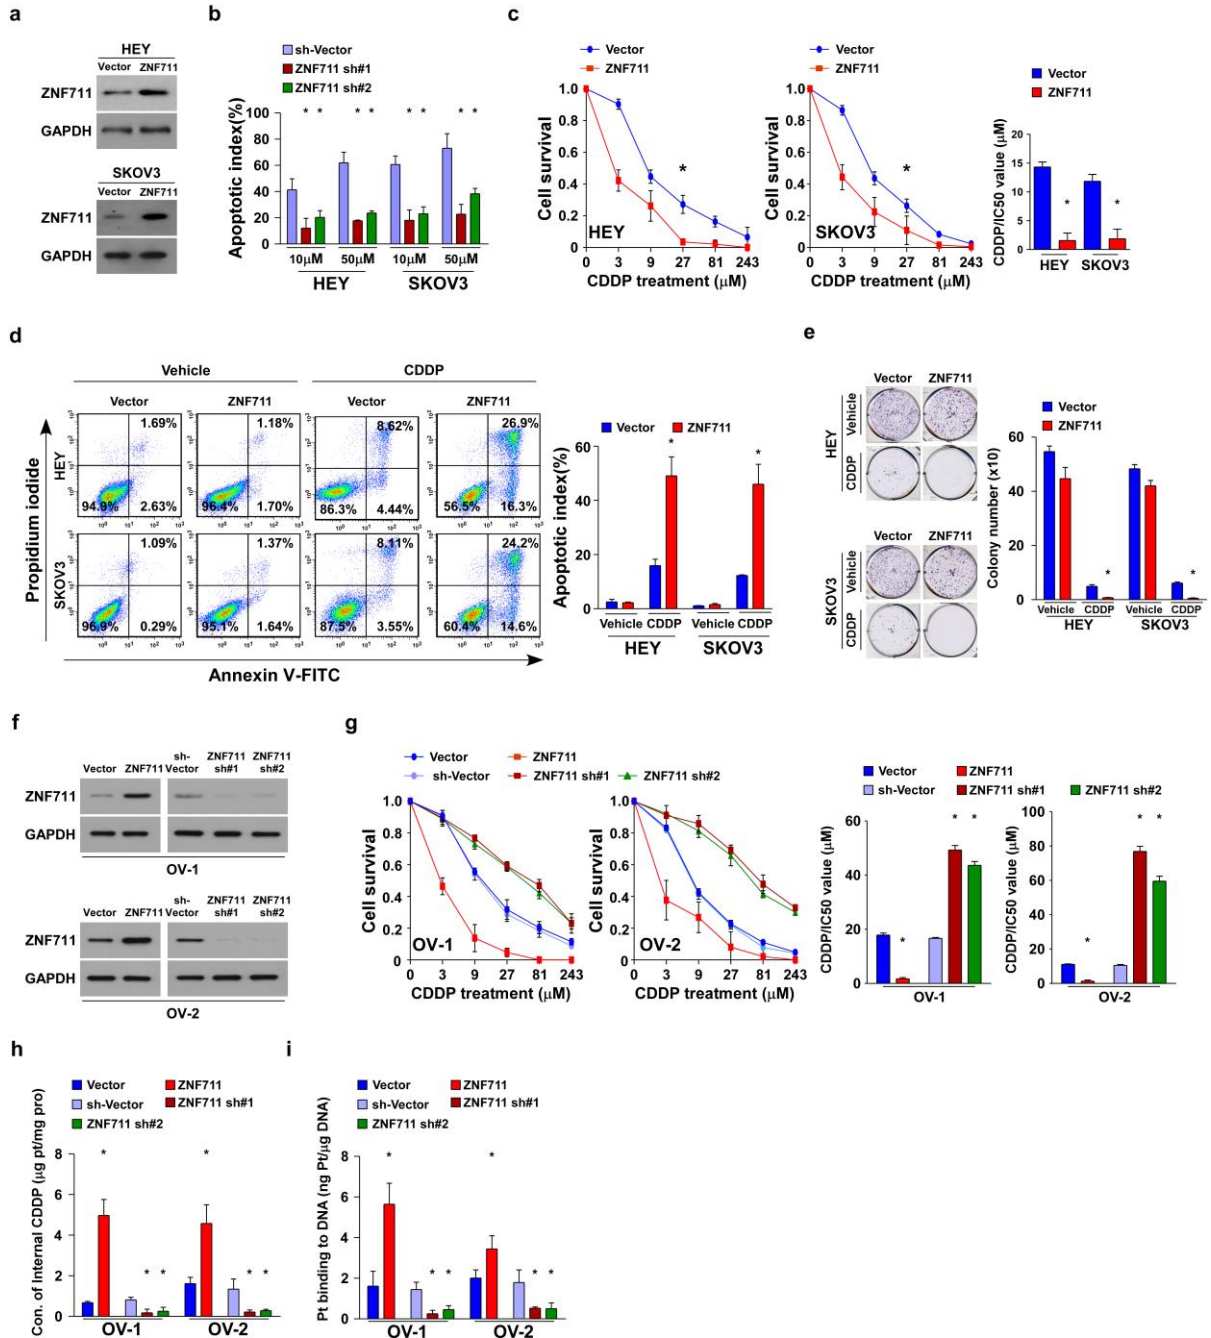

**Supplemental Fig.2. ZNF711 overexpression confers CDDP sensitivity in EOC cells *in vitro*.** (a) Immunoblotting (IB) assays were performed to verify ZNF711 expression in the indicated stable HEY and SKOV3 cell lines. (b) The apoptotic percentage in indicated cells with higher doses of CDDP (10  $\mu$ M and 50  $\mu$ M, respectively). (c) An MTT cell viability assay (left) and half-maximal inhibitory concentration (IC<sub>50</sub>) value of CDDP (right) in HEY and SKOV3 cells stably expressing ZNF711 compared to the cells expressing vector control. (d)

FACS analysis of Annexin V staining (left) and quantification (right) of indicated HEY and SKOV3 stable cell lines treated with vehicle or CDDP (5 $\mu$ M, 24 hrs). **(e)** Representative images (left) and quantification (right) of colony number of the indicated cells treated with vehicle or CDDP (5 $\mu$ M). **(f)** Immunoblotting (IB) assays were performed to verify ZNF711 expression in the indicated stable primary OV-1 and OV-2 cells. **(g)** An MTT cell viability assay (left) and half-maximal inhibitory concentration (IC<sub>50</sub>) value of CDDP (right) in indicated cells. **(h)** Content of intercellular CDDP in the indicated OV-1 and OV-2 cells. **(i)** The quantification of DNA-bound CDDP (Pt) in the indicated OV-1 and OV-2 cells. Each bar shown in the figure represents the mean  $\pm$  SD of three independent experiments. \* $P < 0.05$  (unpaired t-test or one-way ANOVA with Bonferroni's correction).



Supplemental Figure 3

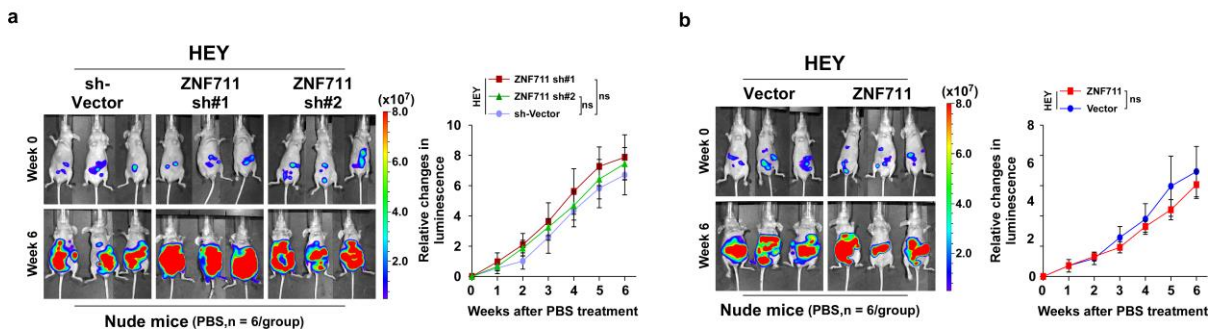

**Supplemental Fig.3. PBS-treated xenograft tumor with atopic expression level of ZNF711 showed similar tumor growth kinetic.** (a) Representative images of tumor-bearing nude mice were presented at the initial time of PBS treatment (upper) and six weeks after PBS treatment (lower) (left panel, n = 6/group). Relative changes in the bioluminescence signal of intraperitoneal tumors in nude mice upon PBS chemotherapy at the indicated time points (right panel). (b) Representative images of tumor-bearing nude mice formed by indicated cells (left) and relative changes in the bioluminescence signal of intraperitoneal tumors (right). Each bar shown in the figure represents the mean  $\pm$  SD of three independent experiments.

Supplemental Figure 4

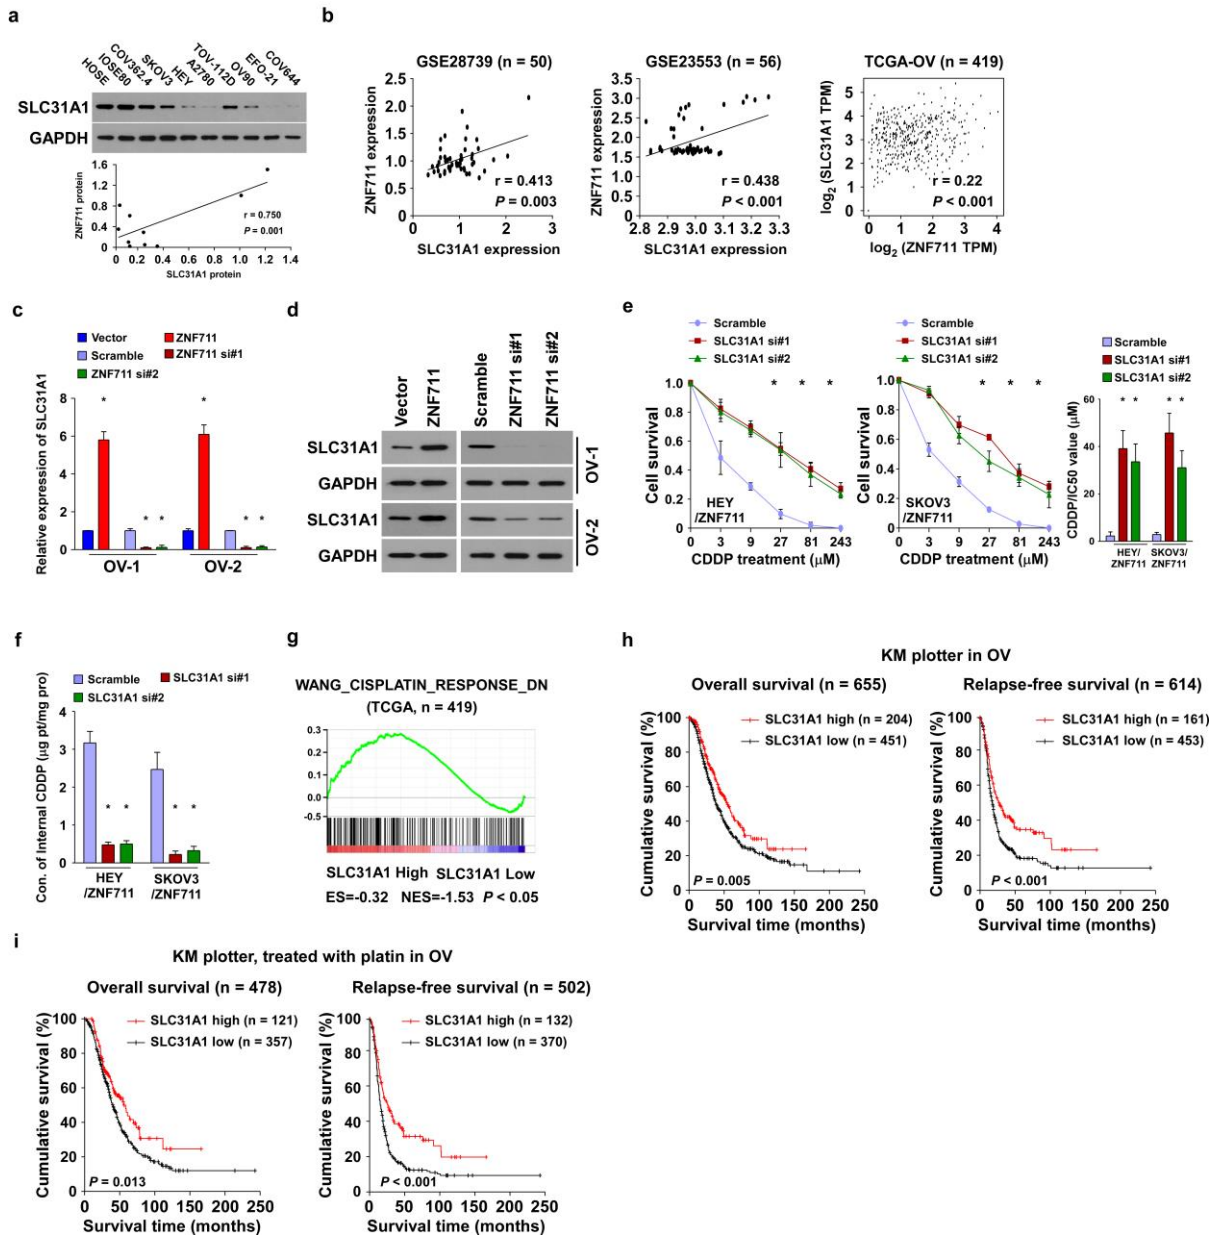

**Supplemental Fig. 4. ZNF711 modulates CDDP resistance via regulating SLC31A1 expression.** (a) The protein expression of SLC31A1 in indicated cells (upper) and the correlation between the protein expression of ZNF711 and SLC31A1 in indicated cells (lower). (b) The correlation between ZNF711 and SLC31A1 in GSEA and TCGA database. (c-d) The mRNA (b) and protein (c) expression of SLC31A1 in OV-1 and OV-2 cells with different expression levels of ZNF711. (e) An MTT cell viability assay (left) and half-maximal inhibitory concentration (IC<sub>50</sub>) value of CDDP (right) in indicated cells. (f) The

intracellular concentration of CDDP in indicated cells. **(g)** GSEA analysis revealed that the expression of SLC31A1 in EOC tissues was negatively correlated with CDDP resistance ( $P < 0.05$ ). **(h-i)** Kaplan-Meier analysis of the overall and relapse-free survival in ovarian cancer patients **(h)** and ovarian cancer patients treated with platinum **(i)**. Each bar shown in the figure represents the mean  $\pm$  SD of three independent experiments.  $*P < 0.05$  (one-way ANOVA with Bonferroni's correction).

### Supplemental Figure 5

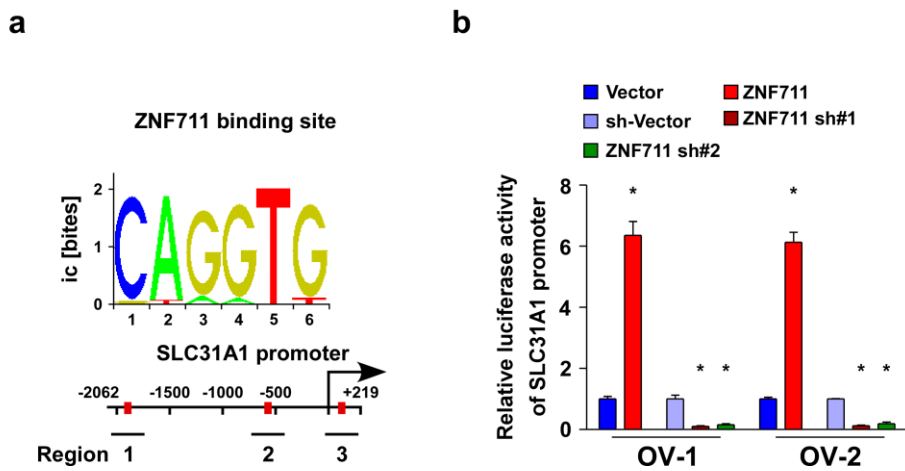

**Supplemental Fig. 5. ZNF711 regulates SLC31A1 promoter activity in EOC cells. (a)** The Schematic diagram of ZNF711 binding site and the promoter regions of SLC31A1. **(b)** The luciferase signal of the SLC31A1 promoter luciferase reporter in indicated OV-1 and OV-2 cells. Each bar shown in the figure represents the mean  $\pm$  SD of three independent experiments.  $*P < 0.05$  (one-way ANOVA with Bonferroni's correction).

**Supplemental Figure 6**

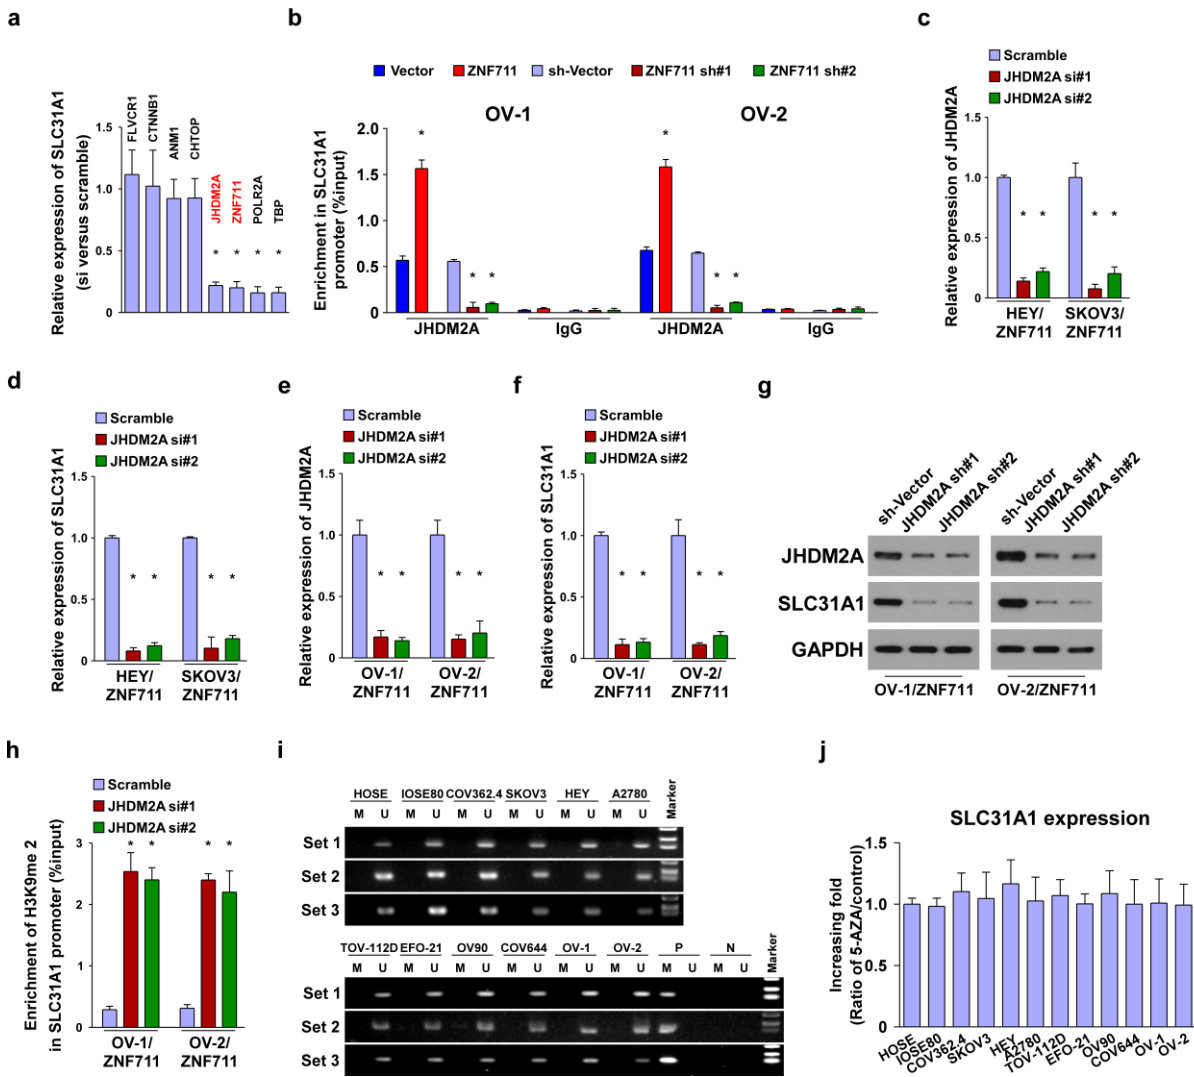

**Supplementary Fig. 6. JHDM2A and SLC31A1 expression in the indicated cells. (a)**

Relative expression of SLC31A1 in the indicated siRNA-transfected cells treated with CDDP.

(b) JHDM2A mRNA expression was suppressed in the indicated EOC cells. (c) The level

of SLC31A1 mRNA expression in the indicated cells. (e-f) The mRNA expression of

JHDM2A and SLC31A1 in the indicated cells. (g) The protein expression JHDM2A and

SLC31A1 in the indicated cells. (h) Enrichment of H3K9me2 in SLC31A1 promoter in

indicated cells. (i) Electrophoresis of PCR products spanning the SLC31A1 promoter from

bisulfite-treated DNA. Each lane contains products generated from separate PCR reactions

using three sets of primers, each of which contains two pairs of primers specific for

methyated (M) or unmethyated (U) DNA template, respectively. The genomic DNA of OV-1 cells treatment with SssI Methyltransferase was used as positive control and water (H<sub>2</sub>O) was used as a negative control for PCR. (j). Increasing fold of SLC31A1 expression in EOC cell lines and primary tumor cells compared with normal ovarian cells with the treatment of 5-AZA versus vehicle control. Each bar shown in the figure represents the mean  $\pm$  SD of three independent experiments. \* $P < 0.05$  (one-way ANOVA with Bonferroni's correction).

**Supplemental Figure 7**

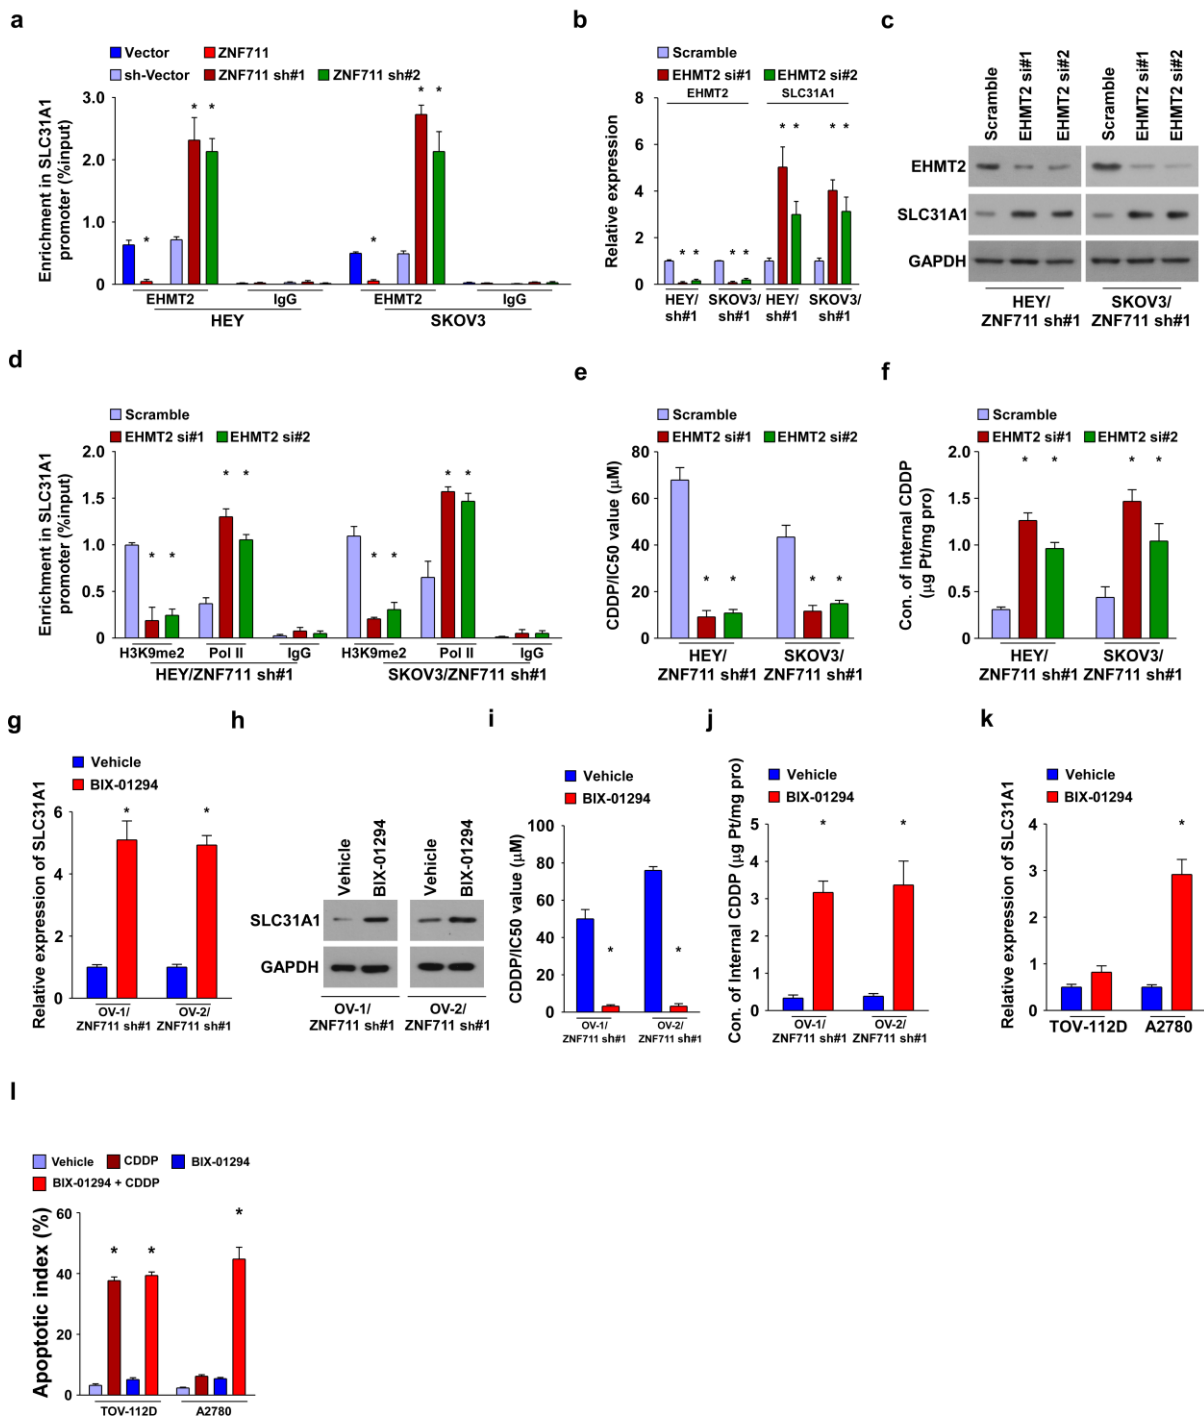

**Supplemental Fig. 7. ZNF711 suppression promotes EHMT2 enrichment in the SLC31A1 promoter.** (a) EHMT2 enrichment in the SLC31A1 promoter was examined in the indicated cells. (b and c) The expression level of EHMT2 and SLC31A1 in the indicated cells. (d) H3K9me2 and Pol II enrichment in the SLC31A1 promoter in cells transfected with EHMT2 siRNA or the scramble. (e) IC50 value of CDDP in the indicated cells. (f) The

concentration of intracellular CDDP in the indicated cells. **(g-h)** The mRNA (g) and protein (h) expression of SLC31A1 in ZNF711-silenced OV-1 and OV-2 cells treated with BIX-01294 (5 $\mu$ M) and CDDP (5 $\mu$ M). **(i)** IC50 value of CDDP in the indicated cells. **(j)** The concentration of intracellular CDDP in indicated OV-1 and OV-2 cells. **(k)** Relative expression of SLC31A1 mRNA expression in TOV-112D and A2780 cells treated with BIX-01294 (5 $\mu$ M) and CDDP (5 $\mu$ M). **(l)** The apoptotic index of TOV-112D and A2780 cells treated with vehicle, CDDP, BIX-01294 (5 $\mu$ M) and BIX-01294 + CDDP (5 $\mu$ M), respectively. Each bar shown in the figure represents the mean  $\pm$  SD of three independent experiments. \* $P$  < 0.05 (unpaired t-test or one-way ANOVA with Bonferroni's correction).

Supplemental Fig.8

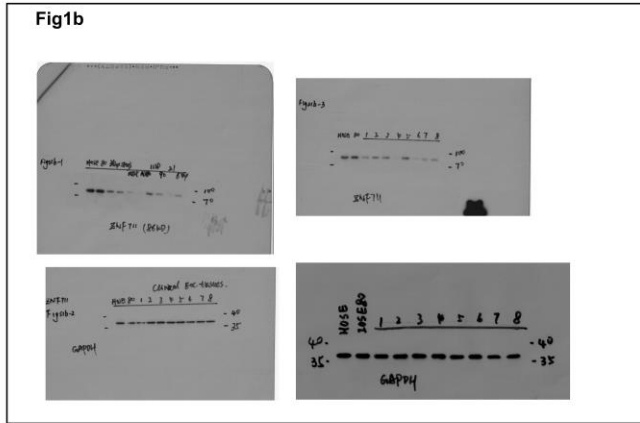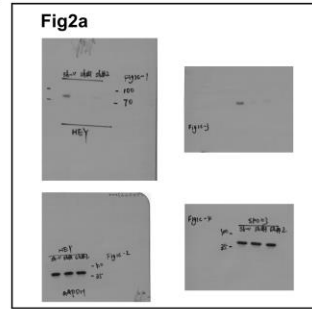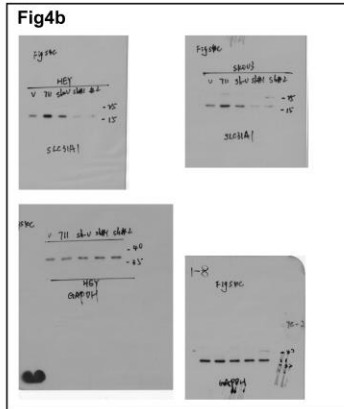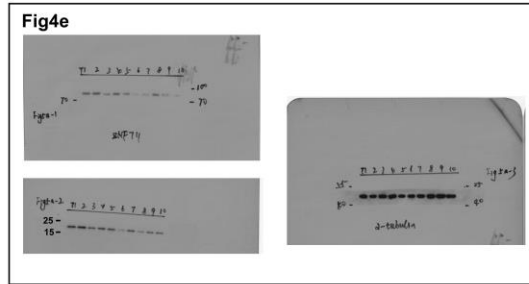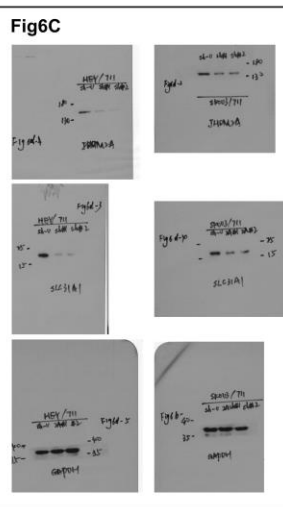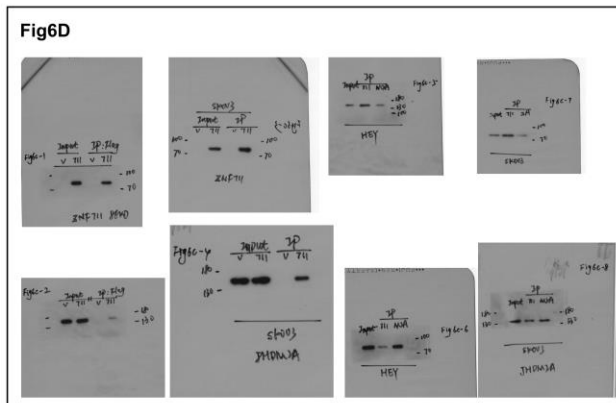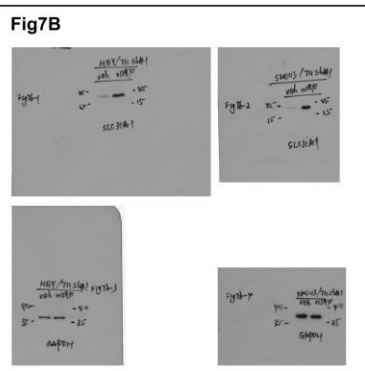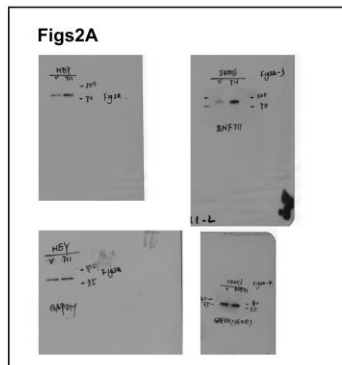



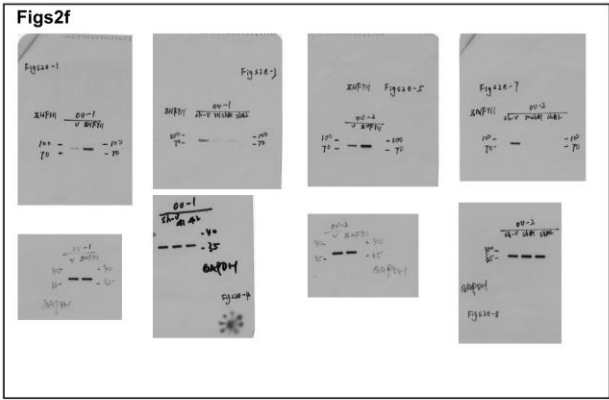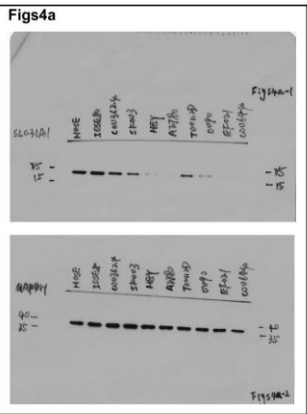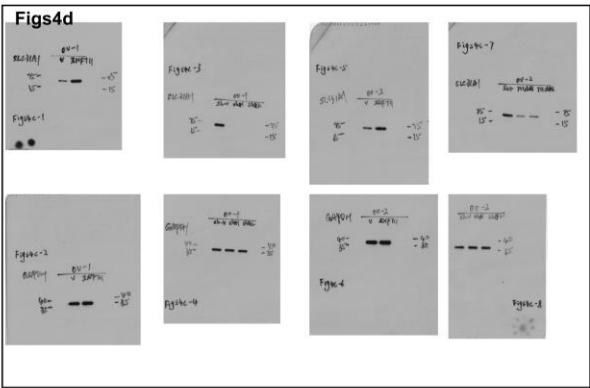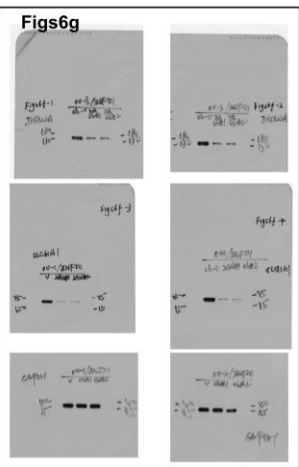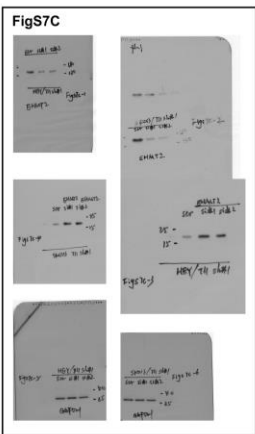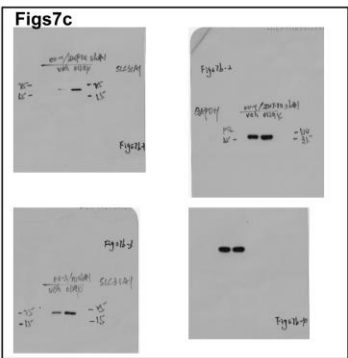

Supplemental Fig. 8. Uncut gel for Figures and Supplemental Figures
